# Supplementary material for: Ultrasensitive detection of the androgen receptor through the recognition of an androgen receptor response element and hybridization chain amplification
Source: Royal Society of Chemistry journal article supplement (doi:10.1039/c9an00034h), 2019-01-01
Supplement: c9an00034h1.pdf [file c9an00034h1.pdf]

*Electronic Supplementary Information*

**Ultrasensitive detection of androgen receptor through the recognition of androgen receptor response element and hybridization chain amplification**

Binbin Yao<sup>a</sup>, Sha Zhu<sup>b</sup>, Xinyu Xu<sup>c\*</sup>, Ninghan Feng<sup>c</sup>, Yaping Tian<sup>a</sup>, Nandi Zhou<sup>a\*</sup>

<sup>a</sup> The Key Laboratory of Carbohydrate Chemistry and Biotechnology, Ministry of Education, School of Biotechnology, Jiangnan University, Wuxi 214122, China

<sup>b</sup> Department of Oncology, The Affiliated Wuxi No.2 People's Hospital of Nanjing Medical University, Wuxi 214002, China

<sup>c</sup> Department of Urology, The Affiliated Wuxi No.2 People's Hospital of Nanjing Medical University, Wuxi 214002, China

\*Corresponding authors. E-mail: xugongxixi@sohu.com (X. Xu);  
zhounandi@jiangnan.edu.cn (N. Zhou)

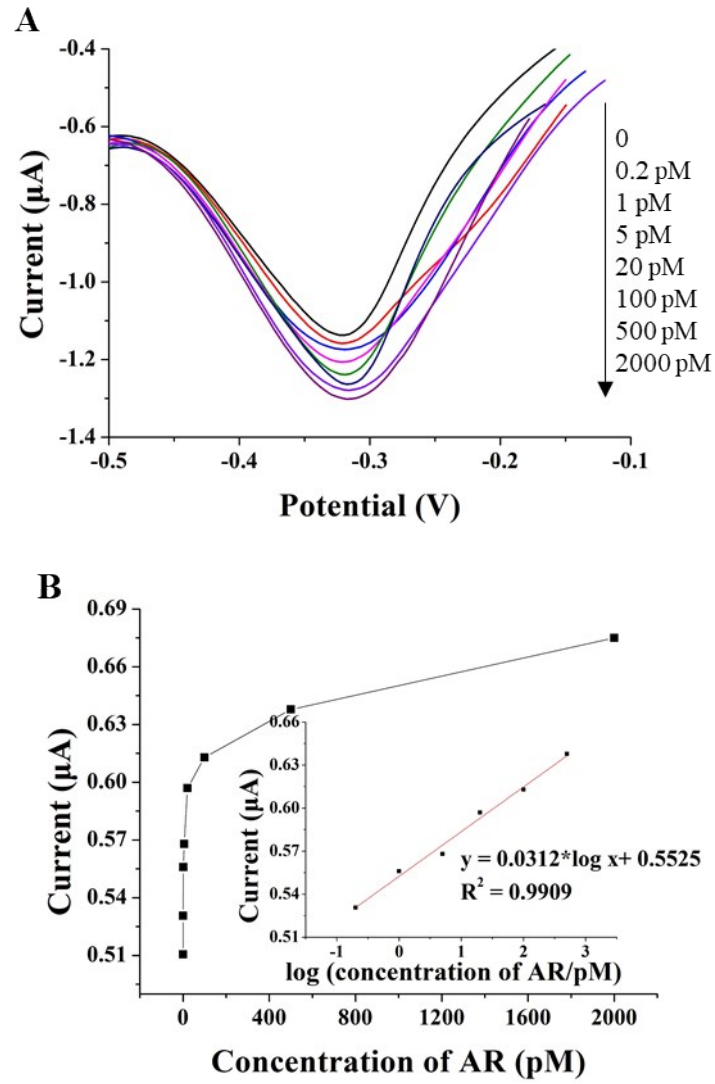

**Fig. S1** (A) DPV curves obtained in the presence of different concentration of AR in human serum samples; (B) The relationship between the peak current in DPV and the concentration of AR in human serum; Inset shows the linear relationship.
